# Supplementary material for: The conflict between sampling resolution and stratigraphic constraints from a Bayesian perspective: OSL and radiocarbon case studies
Source: Copernicus journal article supplement (doi:10.5194/egusphere-2025-890), 2025-03-12
Supplement: Supplementary file 1 [file SupplementaryMaterialOfGuerinEtAl-BayesStratiCons.pdf › GuerinEtAl-BayesSC-SuppMat/SupplementaryMaterialOfGuerinEtAl-BayesStratiCons.pdf]

**Supplementary material of ‘The conflict between sampling resolution and stratigraphic constraints from a Bayesian perspective: OSL and radiocarbon case studies’ by Guérin et al.**

**Table of contents**

1. Table S1
2. OxCal code (Çatalhöyük, <sup>14</sup>C)
3. Chronomodel code (Çatalhöyük, <sup>14</sup>C)
4. BayLum code (Çatalhöyük, <sup>14</sup>C)

**1. Table S1.** All radiocarbon ages used in this study. These ages were originally published by Bayliss et al. (2015; see main text for details).

| Sample        | Stratigraphic Unit | <sup>14</sup> C age (years BP) | Calibrated age (95% C.I., years BC) |
|---------------|--------------------|--------------------------------|-------------------------------------|
| UCIAMS-103134 | 4779.F16           | 7955±25                        | 7037-6699                           |
| UCIAMS-98210  | 4555               | 7940±30                        | 7035-6691                           |
| P-782         | Level X            | 8092±98                        | 7443-6694                           |
| OxA-21261     | 4853               | 8033±39                        | 7074-6775                           |
| OxA-21262     | 4861               | 7955±40                        | 7039-6696                           |
| UCIAMS-103138 | 4850.F151          | 7920±25                        | 7031-6653                           |
| OxA-23247     | 4850.F149          | 8027±37                        | 7070-6775                           |
| OxA-9774      | 4715               | 7935±50                        | 7039-6696                           |
| OxA-9946      | 4715               | 7980±55                        | 7039-6696                           |
| UCIAMS-98209  | 4517.F1 & F2       | 7990±25                        | 7048-6775                           |
| UCIAMS-98208  | 4517.F7            | 7965±25                        | 7041-6701                           |
| OxA-9947      | 4822               | 7985±50                        | 7052-6697                           |
| OxA-9775      | 4826               | 8090±55                        | 7243-6833                           |
| OxA-9948      | 4826               | 8090±50                        | 7243-6833                           |
| OxA-23523     | 4828               | 7931±38                        | 7037-6701                           |
| UCIAMS-103135 | 4828               | 7970±25                        | 7037-6701                           |
| UCIAMS-103141 | 4869.F3 & F4       | 7980±25                        | 7045-6706                           |
| OxA-23248     | 4869.F1 & F2       | 8082±37                        | 7179-6830                           |
| OxA-27087     | 4867.F7            | 8000±40                        | 7058-6702                           |
| UCIAMS-103140 | 4867.F5 & F6       | 8025±25                        | 7061-6827                           |
| UCIAMS-103139 | 4865.F3-F5         | 7970±25                        | 7043-6702                           |
| UCIAMS-103136 | 4836.F571          | 7940±25                        | 7035-6691                           |
| UCIAMS-103137 | 4837.F12           | 7965±30                        | 7041-6700                           |
| OxA-9949      | 4848               | 8050±50                        | 7172-6706                           |
| OxA-23249     | 4878.F397 & F398   | 8034±35                        | 7066-6776                           |
| OxA-9950      | 5276               | 8030±50                        | 7128-6701                           |
| UCIAMS-109991 | 5279.F1 & F2       | 8035±30                        | 7068-6826                           |
| UCIAMS-109992 | 5283.F1 & F2       | 8030±30                        | 7066-6823                           |
| OxA-23250     | 5283.F3 & F4       | 8085±36                        | 7180-6831                           |
| OxA-9976      | 5292               | 7985±55                        | 7053-6696                           |
| OxA-23251     | 5308.F89 & F90     | 8137±36                        | 7314-7048                           |

|               |                |               |                    |
|---------------|----------------|---------------|--------------------|
| UCIAMS-109993 | 5316.F1 & F2   | 8160 $\pm$ 30 | 7316-7061          |
| OxA-9892      | 5317           | 8150 $\pm$ 50 | 7326-7047          |
| OxA-9777      | 5323           | 8160 $\pm$ 50 | 7326-7052          |
| UCIAMS-109994 | 5323.F70 & F71 | 8210 $\pm$ 30 | 7335-7077          |
| OxA-9778      | 5324           | 8210 $\pm$ 30 | 7461-7076          |
| OxA-23252     | 5328           | 8199 $\pm$ 36 | 7328-7075          |
| OxA-9893      | 5329           | 8155 $\pm$ 50 | 7326-7049          |
| AA-27982      | Pre XII.D      | 8195 $\pm$ 80 | 7471-7047          |
| PL-980525A    | Pre XII.D      | 8390 $\pm$ 90 | 7387,5 $\pm$ 201,5 |

## 2. OxCal code

```
Plot()
{
  Phase("")
  {
    Outlier_Model("General",T(5),U(0,4),"t");
    Sequence("Catalhoyuk East")
    {
      Boundary("Start Mound");
      Phase("pre XII.D")
      {
        After("core CH94")
        {
          R_Date("PL-980525A",8390,90);
          Outlier(0.05);
          R_Date("AA-27982",8195,80);
          Outlier(0.05);
        };
        Sequence("(5329)/(5328)/(5327)/(5324)")
        {
          Phase("(5329)")
          {
            R_Date("OxA-9893",8155,50);
            Outlier(0.05);
          };
          Phase("(5328)")
          {
            R_Date("OxA-23252",8199,36);
            Outlier(0.05);
          };
          Phase("(5324)")
          {
            R_Date("OxA-9778",8240,55);
```

```

    Outlier(0.05);
};
};
};
Date("pre XII.D/pre XII.C");
Sequence("pre XII.C")
{
    Phase("5323")
    {
        R_Date("UCIAMS-109994",8210,30);
        Outlier(0.05);
        Phase("Plant remains")
        {
            R_Date("OxA-9777",8160,50);
            Outlier(0.05);
        };
    };
    Phase("plant remains")
    {
        R_Date("OxA-9892",8150,50);
        Outlier(0.05);
    };
    R_Date("UCIAMS-109993",8160,30);
    Outlier(0.05);
    R_Date("OxA-23251",8137,36);
    Outlier(0.05);
};
Date("pre XII.C/pre XII.B");
Sequence("pre XII.B")
{
    Phase("plant remains")
    {
        R_Date("OxA-9776",7985,55);

```

```

    Outlier(0.05);
};
Phase("(5283.F3 & F4)")
{
    R_Date("OxA-23250", 8085, 36);
    Outlier(0.05);
    R_Date("UCIAMS-109992", 8030, 30);
    Outlier(0.05);
};
R_Date("UCIAMS-109991", 8035, 30);
Outlier(0.05);
Phase("plant remains")
{
    R_Date("OxA-9950", 8030, 50);
    Outlier(0.05);
};
R_Date("OxA-23249", 8024, 35);
Outlier(0.05);
};
Date("pre XII.B/pre XII.A");
Phase("pre XII.A")
{
    Sequence("(4848)/(4837)/(4836)")
    {
        Phase("(4848)")
        {
            R_Date("OxA-9949", 8050, 50);
            Outlier(0.05);
        };
        R_Date("UCIAMS-103137", 7965, 30);
        Outlier(0.05);
        Phase("(4836)")
        {

```

```

    R_Date("UCIAMS-103136",7940,25);
    Outlier(0.05);
};
};
Sequence("(4865)/(4867)/(4869)")
{
    R_Date("UCIAMS-103139",7970,25);
    Outlier(0.05);
    Phase("(4867")
    {
        R_Date("UCIAMS-103140",8025,25);
        Outlier(0.05);
        R_Date("OxA-27087",8000,40);
        Outlier(0.05);
    };
    Phase("(4869)")
    {
        R_Date("OxA-23248",8082,37);
        Outlier(0.05);
        R_Date("UCIAMS-103141",7980,25);
        Outlier(0.05);
    };
};
};
Boundary("end pre XII.A/start Sp.199");
Phase("SP.199")
{
    Sequence("(4828)/(4826)/(4822)")
    {
        R_Combine("4828")
        {
            R_Date("UCIAMS-103135",7970,25);
            Outlier(0.05);

```

```

    R_Date("OxA-23523",7931,38);
    Outlier(0.05);
};
After("4826")
{
    R_Combine("4826")
    {
        R_Date("OxA-9948",8090,50);
        Outlier(0.05);
        R_Date("OxA-9775",8090,55);
        Outlier(0.05);
    };
};
After("plant remains")
{
    R_Date("OxA-9947",7985,50);
    Outlier(0.05);
};
};
R_Date("UCIAMS-98209",7990,25);
Outlier(0.05);
R_Date("UCIAMS-98208",7965,25);
Outlier(0.05);
};
Boundary("end Sp.199/Start Sp.198");
Phase("Sp.198")
{
    After("plant remains")
    {
        R_Combine("4715")
        {
            R_Date("OxA-9946",7980,55);
            Outlier(0.05);

```



```

    R_Date("OxA-9774",7935,50);
    Outlier(0.05);
};

};

R_Date("OxA-23247",8027,37);
Outlier(0.05);
R_Date("UCIAMS-103138",7920,25);
Outlier(0.05);
};

Boundary("end Sp.198/start B.23(E.X.I)=B.18(E.X.8)");
Before("B.23(E.X.I)=B.18(E.X.8)")
{
    Sequence("(4861)/(4853)")
    {
        R_Date("OxA-21261",8033,39);
        Outlier(0.05);
        R_Date("OxA-21262",7955,40);
        Outlier(0.05);
    };
    After("unidentified charcoal")
    {
        R_Date("P-782",8092,98);
        Outlier(0.05);
    };
    R_Date("UCIAMS-103134",7955,25);
    Outlier(0.05);
    R_Date("UCIAMS-98210",7940,30);
    Outlier(0.05);
};

};

};

};

```

### **3. Chronomodel code**

See attached file 'Catalhoyuk final.chr'

#### 4. BayLum code

#### This code is associated with the article entitled 'The conflict between sampling resolution and stratigraphic constraints from a Bayesian perspective' by Guérin et al.

```
library(BayLum)

library(ArchaeoPhases)

setwd("MyWorkingDirectory")

Path=c("MyPath")

##### Note: the samples below come from Bayliss et al. (2015).
All outliers recognized as such by Bayliss et al. have been removed
from the following list

C14_SampleNames = c("OxA-21261","OxA-21262","UCIAMS-98210","UCIAMS-
103134","P-782","UCIAMS-103138","OxA-23247","OxA-9774","OxA-
9946","UCIAMS-98208","UCIAMS-98209","OxA-9947","OxA-9775","OxA-
9948","OxA-23523","UCIAMS-103135","UCIAMS_103136","UCIAMS-
103137","OxA-23248","UCIAMS-103141","UCIAMS-103140","OxA-
27087","OxA-9949","UCIAMS-103139","OxA-23249","OxA-9950","UCIAMS-
109991","OxA-23250","UCIAMS-109992","OxA-9776","OxA-23251","UCIAMS-
109993","OxA-9892","OxA-9777","UCIAMS-109994","OxA-9778","OxA-
23252","OxA-9893","PL-980525A","AA-27982")

C14_Nb_sample = length(C14_SampleNames)

C14ages =
c(8033,7955,7940,7955,8092,7920,8027,7935,7980,7965,7990,7985,8090,8
090,7931,7970,7940,7965,8082,7980,8025,8000,8050,7970,8024,8030,8035
,8085,8030,7985,8137,8160,8150,8160,8210,8240,8199,8155,8390,8195)

C14agesEr =
c(39,40,30,25,98,25,37,50,55,25,25,50,55,50,38,25,25,30,37,25,25,50,
40,25,35,50,30,36,30,55,36,30,50,50,30,55,36,50,90,80)

AC14_WithoutStratigraphicConstraints=AgeC14_Computation(Data_C14Cal=
C14ages, Data_SigmaC14Cal=C14agesEr,SampleNames=C14_SampleNames,
Nb_sample = C14_Nb_sample,PriorAge = rep(c(7, 13), C14_Nb_sample),
SavePdf = TRUE,OutputFileName = c("MCMCplot","HPD_CalC-14Curve",
"summary"),OutputFilePath = Path, SaveEstimates = TRUE,
OutputTableName = c("AllC14"), OutputTablePath =
c(""),StratiConstraints = c(), sepSC = c(", "), Model = c("full"),
CalibrationCurve = c("IntCal20"), Iter = 5000, t = 5, n.chains = 3,
quiet = FALSE)
```

```

SC = matrix(data=0,ncol=40,nrow=41) ### matrix to account for
stratigraphic constraints

SC[1,]=rep(1,40)

SC[2,]=c(rep(0,1),rep(1,1),rep(0,3),rep(1,35)) #4853

SC[3,]=c(rep(0,5),rep(1,35)) #4861

SC[4,]=c(rep(0,5),rep(1,35)) #4555

SC[5,]=c(rep(0,5),rep(1,35)) #4779

SC[6,]=rep(0,40) #P782 After

SC[7,]=c(rep(0,9),rep(1,31)) #4850

SC[8,]=c(rep(0,9),rep(1,31)) #4850

SC[9,]=rep(0,40) #4715 (After)

SC[10,]=rep(0,40) #4715 (After)

SC[11,]=c(rep(0,18),rep(1,4),rep(0,1),rep(1,17)) #4517

SC[12,]=c(rep(0,18),rep(1,4),rep(0,1),rep(1,17)) #4517

SC[13,]=rep(0,40) #4822 (After)

SC[14,]=rep(0,40) #4826 (After)

SC[15,]=rep(0,40) #4826 (After)

SC[16,]=c(rep(0,16),rep(1,2),rep(0,4),rep(1,1),rep(0,1),rep(1,16))
#4828

SC[17,]=c(rep(0,16),rep(1,2),rep(0,4),rep(1,1),rep(0,1),rep(1,16))
#4828

SC[18,]=c(rep(0,17),rep(1,1),rep(0,4),rep(1,1),rep(0,1),rep(1,16))
#4836

SC[19,]=c(rep(0,22),rep(1,1),rep(0,1),rep(1,16)) #4837

SC[20,]=c(rep(0,19),rep(1,2),rep(0,1),rep(1,18)) #4869

SC[21,]=c(rep(0,19),rep(1,2),rep(0,1),rep(1,18)) #4869

SC[22,]=c(rep(0,22),rep(1,18)) #4867

SC[23,]=c(rep(0,22),rep(1,18)) #4867

SC[24,]=c(rep(0,24),rep(1,16)) #4848

SC[25,]=c(rep(0,24),rep(1,16)) #4865

SC[26,]=c(rep(0,25),rep(1,15)) #4878

SC[27,]=c(rep(0,26),rep(1,14)) #5276

SC[28,]=c(rep(0,27),rep(1,13)) #5279

SC[29,]=c(rep(0,29),rep(1,11)) #5283

```

```

SC[30,]=c(rep(0,29),rep(1,11)) #5283
SC[31,]=c(rep(0,30),rep(1,10)) #5292
SC[32,]=c(rep(0,31),rep(1,9)) #5308
SC[33,]=c(rep(0,32),rep(1,8)) #5316
SC[34,]=c(rep(0,33),rep(1,7)) #5317
SC[35,]=c(rep(0,35),rep(1,5)) #5323
SC[36,]=c(rep(0,35),rep(1,5)) #5323
SC[37,]=c(rep(0,36),rep(1,4)) #5324
SC[38,]=c(rep(0,37),rep(1,3)) #5328
SC[39,]=c(rep(0,38),rep(1,2)) #5329
SC[40,]=rep(0,40) #pre XII (After)
SC[41,]=rep(0,40) #pre XII (After)

```

```

AC14_WithStratiConstraints=AgeC14_Computation(Data_C14Cal=C14ages,
Data_SigmaC14Cal=C14agesEr, SampleNames=C14_SampleNames, Nb_sample =
C14_Nb_sample, PriorAge = rep(c(8, 10), C14_Nb_sample), SavePdf =
TRUE, OutputFileName = c("MCMCplot","HPD_CalC-14Curve", "summary"),
OutputFilePath = Path, SaveEstimates = TRUE, OutputTableName =
c("AllC14"), OutputTablePath = c(""), StratiConstraints = SC, sepSC
= c(", "), Model = c("full"), CalibrationCurve = c("IntCal20"), Iter
= 500000, t = 5, n.chains = 3, quiet = FALSE)

```
